# Supplementary material for: Impact of meltwater flow intensity on the spatiotemporal heterogeneity of microbial mats in the McMurdo Dry Valleys, Antarctica
Source: PubMed Central journal article supplement (PMC9870883; doi:10.1038/s43705-022-00202-8), 2023-01-23
Supplement: 43705_2022_202_MOESM1_ESM.pdf [file 43705_2022_202_MOESM1_ESM.pdf]

**Table S1** Ash Free Dry Mass (AFDM), Chlorophyll a (Chl a) and AFDM to Chl a ratio values for green, orange, red and black mats collected from 1/9/17.

| <b>Color</b> | <b>AFDM</b> | <b>Chl a</b> | <b>AFDM:Chl a ratio</b> |
|--------------|-------------|--------------|-------------------------|
| green        | 7.84        | 2.91         | 2.69                    |
| orange       | 14.3        | 3.06         | 4.69                    |
| red          | 22.8        | 2.52         | 9.06                    |
| black        | 27.8        | 0.229        | 121                     |
