# Supplementary material for: Impact of meltwater flow intensity on the spatiotemporal heterogeneity of microbial mats in the McMurdo Dry Valleys, Antarctica
Source: PubMed Central journal article supplement (PMC9870883; doi:10.1038/s43705-022-00202-8), 2023-01-23
Supplement: 43705_2022_202_MOESM2_ESM.pdf [file 43705_2022_202_MOESM2_ESM.pdf]

**Table S2** Percent of reads mapping to assembled contigs.

| <b>Sample name</b> | <b>Input reads</b> | <b>Mapped reads</b> | <b>Percent mapped (%)</b> |
|--------------------|--------------------|---------------------|---------------------------|
| Black_11/30/16     | 21126758           | 15735076            | 74.48                     |
| Red_11/30/16       | 20784516           | 15479372            | 74.48                     |
| Black_12/18/16     | 11094418           | 5769906             | 52.01                     |
| Green_12/18/16     | 13588045           | 9308454             | 68.50                     |
| Orange_12/18/16    | 10469485           | 7505729             | 71.69                     |
| Red_12/18/16       | 12327150           | 7271758             | 58.99                     |
| Black_1/9/17       | 15623537           | 12174294            | 77.92                     |
| Green_1/9/17       | 14577043           | 10100914            | 69.29                     |
| Orange_1/9/17      | 21453836           | 16381587            | 76.36                     |
| Red_1/9/17         | 11584920           | 6875813             | 59.35                     |
| Black_1/26/17      | 13376586           | 8564903             | 64.03                     |
| Green_1/26/17      | 13987720           | 9480637             | 67.78                     |
| Orange_1/26/17     | 20033354           | 15415220            | 76.95                     |
| Red_1/26/17        | 5841525            | 2167901             | 37.11                     |
