# Supplementary material for: Impact of meltwater flow intensity on the spatiotemporal heterogeneity of microbial mats in the McMurdo Dry Valleys, Antarctica
Source: PubMed Central journal article supplement (PMC9870883; doi:10.1038/s43705-022-00202-8), 2023-01-23
Supplement: 43705_2022_202_MOESM4_ESM.pdf [file 43705_2022_202_MOESM4_ESM.pdf]

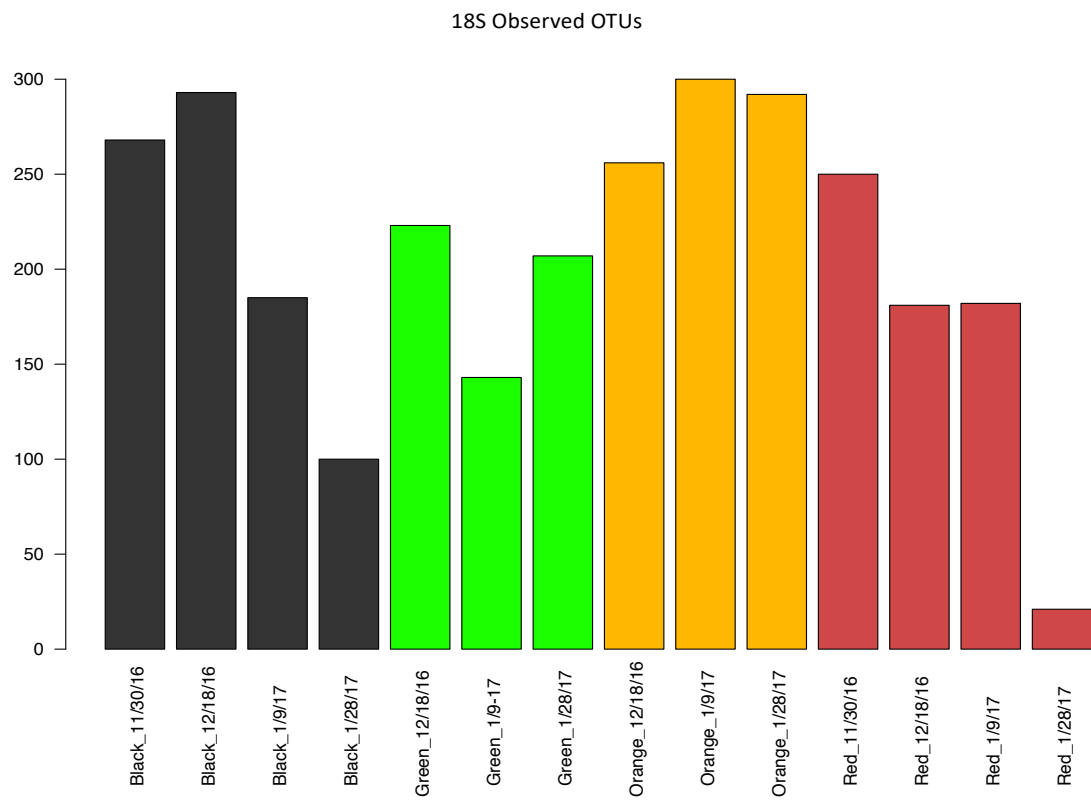

**Figure S2** Bar graph of observed richness of 18S rRNA OTUs for black, green, red and orange mat individual samples.
