# Supplementary material for: Impact of meltwater flow intensity on the spatiotemporal heterogeneity of microbial mats in the McMurdo Dry Valleys, Antarctica
Source: PubMed Central journal article supplement (PMC9870883; doi:10.1038/s43705-022-00202-8), 2023-01-23
Supplement: 43705_2022_202_MOESM7_ESM.pdf [file 43705_2022_202_MOESM7_ESM.pdf]

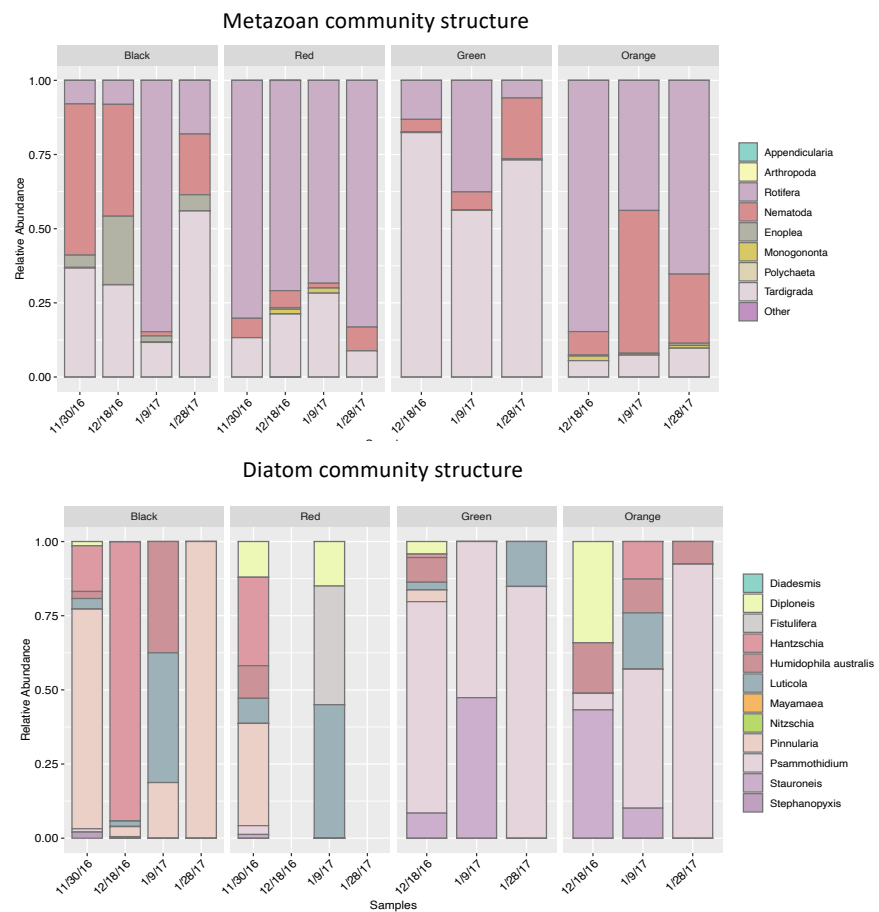

**Figure S5** Relative abundance of **(top)** metazoan and **(bottom)** diatom community members derived from 18S rRNA ASVs. Diatoms were not detected in 12/18/16 or 1/28/17 red mat samples.
