# Supplementary material for: Impact of meltwater flow intensity on the spatiotemporal heterogeneity of microbial mats in the McMurdo Dry Valleys, Antarctica
Source: PubMed Central journal article supplement (PMC9870883; doi:10.1038/s43705-022-00202-8), 2023-01-23
Supplement: 43705_2022_202_MOESM8_ESM.pdf [file 43705_2022_202_MOESM8_ESM.pdf]

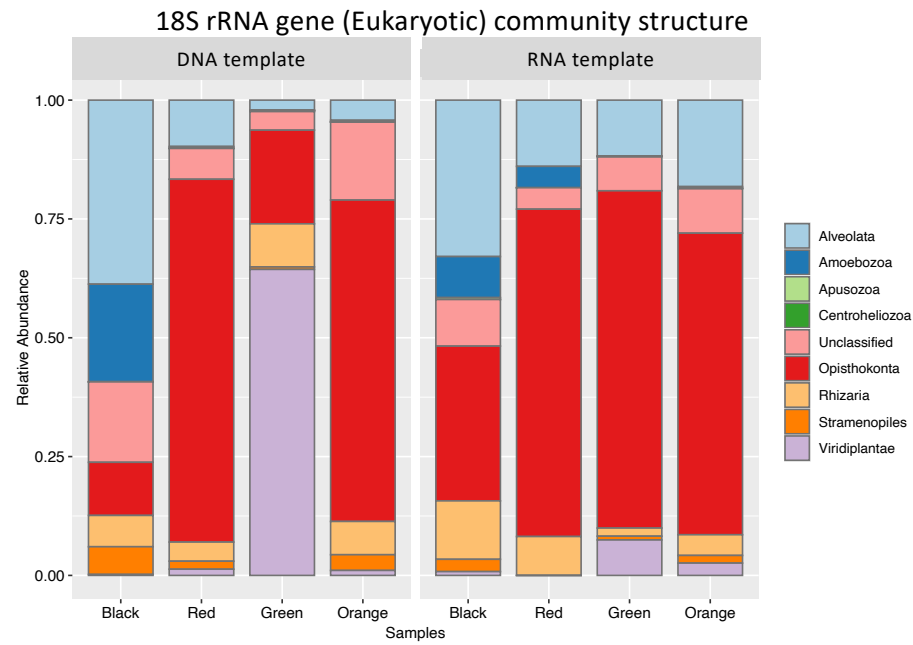

**Figure S6** Comparison of eukaryote relative abundances from 01/28/17 black, red, green and orange mats showing differences between 18 rRNA communities sequenced from DNA (**left**) vs RNA (**right**) templates.
