# Supplementary material for: Impact of meltwater flow intensity on the spatiotemporal heterogeneity of microbial mats in the McMurdo Dry Valleys, Antarctica
Source: PubMed Central journal article supplement (PMC9870883; doi:10.1038/s43705-022-00202-8), 2023-01-23
Supplement: 43705_2022_202_MOESM9_ESM.pdf [file 43705_2022_202_MOESM9_ESM.pdf]

Black mat antifreeze activity assay: Dendritic burst  
(stills per 0.2 seconds) Cooling rate: 0.074 °C per minute

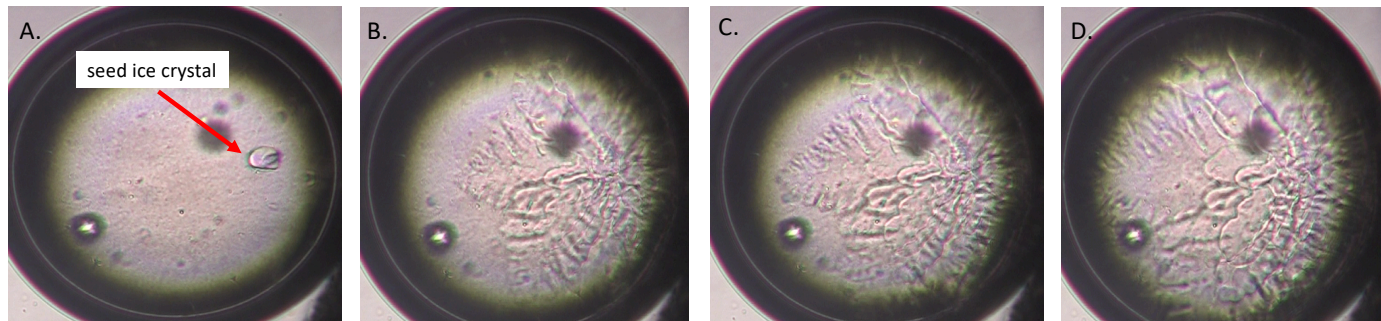

Control 1000 mOmol standard  
(stills per 1 second) Cooling rate: 0.074 °C per minute

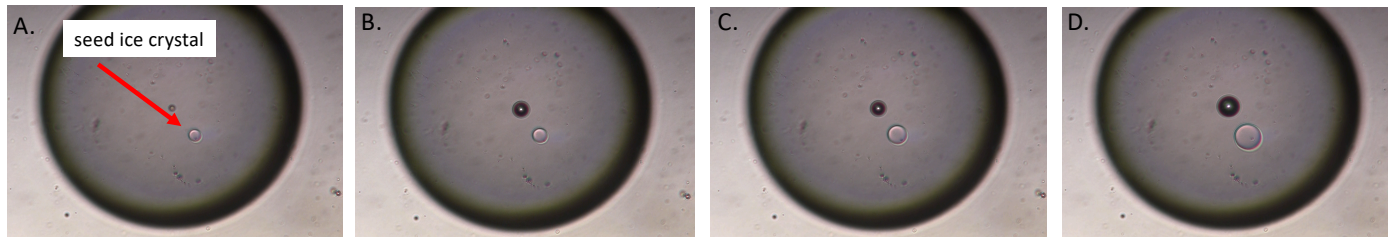

**Figure S7 (top)** Visualization of a dendritic burst of a seed ice crystal cooled at a rate of 0.074°C/min in a well with black mat sample lysate. Images are taken sequentially (A) 0.2 sec (B) 0.4 sec (C) 0.6 sec (D) 0.8 sec.

**(bottom)** A seed ice crystal cooled at a rate of 0.074°C/min in a well with 1000 mOsmol standard. Images are taken sequentially (A) 1 sec (B) 2 sec (C) 3 sec (D) 4 sec
